# Supplementary material
Source: publisher figshare collection journal article supplement (https://sage.figshare.com/ndownloader/files/38308167)

**Novel Functional Peptide for Next-Generation Vital Pulp Therapy**

M. Watanabe1, M. Okamoto1, S. Komichi1, H. Hailing1, S. Matsumoto1, K. Moriyama1, J. Ohshima1, S. Abe1, M. Morita1, M. Ali2, K. Takebe3, I. Kozaki4, A, Fujimoto5, K. Kanie56, R. Kato5, K. Uto7, M. Ebara7, A. Yamawaki-Ogata8, Y. Narita8, Y. Takahashi1, M. Hayashi1

1 Department of Restorative Dentistry and Endodontology, Osaka University Graduate School of Dentistry, Osaka, Japan

2 Department of Restorative Dentistry, Faculty of Dentistry, University of Khartoum, Khartoum, Sudan

3 Department of Oral and Maxillofacial Surgery Ⅱ, Osaka University Graduate School of Dentistry, Osaka, Japan

4 Department of Biomolecular Engineering, Graduate School of Engineering, Nagoya University, Aichi, Japan.

5 Department of Basic Medicinal Sciences, Graduate School of Pharmaceutical Sciences, Nagoya University, Aichi, Japan

6Department of Biotechnology and Chemistry, Faculty of Engineering, Kindai University, Hiroshima, Japan

7International Center for Materials Nanoarchitectonics (WPI-MANA), National Institute for Materials Science (NIMS), Ibaraki, Japan

8Department of Cardiac Surgery, Nagoya University Graduate School of Medicine, Aichi, Japan

**Corresponding author.**

Yusuke TAKAHASHI DDS, PhD

Department of Restorative Dentistry and Endodontology,

Osaka University Graduate School of Dentistry

1-8 Yamadaoka, Suita, Osaka 565-0871, Japan

Tel/Fax: +81 6 6879 2927

Email: takahashi.yusuke.dent@osaka-u.ac.jp

**Appendix Table 1.** Alignment of extracted amino acid sequences for 58 candidate peptides

No. 1–19: S100A7-derived peptide

No. 20–38: S100A8-derived peptide

No. 39–58: S100A9-derived peptide

No. 59: Random sequence peptide that does not show mineralization-inducing ability, used as a negative control

No. 60: BMP2-derived peptide that has been reported to promote pulp wound healing, used as a positive control

**Appendix Table 2.** Criteria for assessment of changes in protein expression levels after incubation with each cell membrane or cytoplasmic protein and corresponding fragment


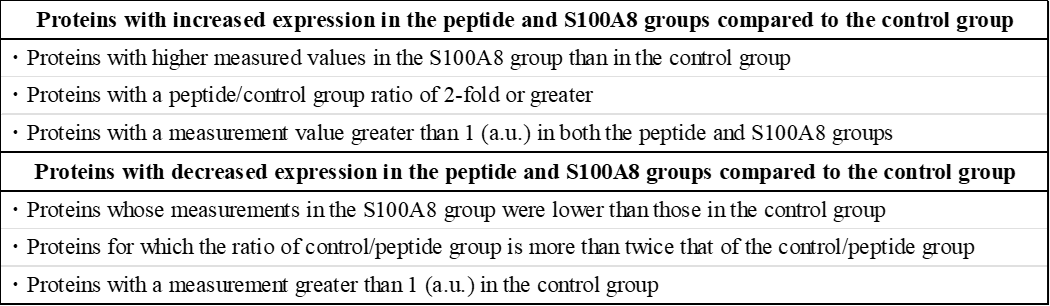


**Appendix Table 3.** Upregulatedproteins identified by LC-MS/MS in hDPSCs incubated with Protein S100 family-derived peptide or S100A8 for angiogenesis and SMAD signaling

**Appendix Figure 1.**


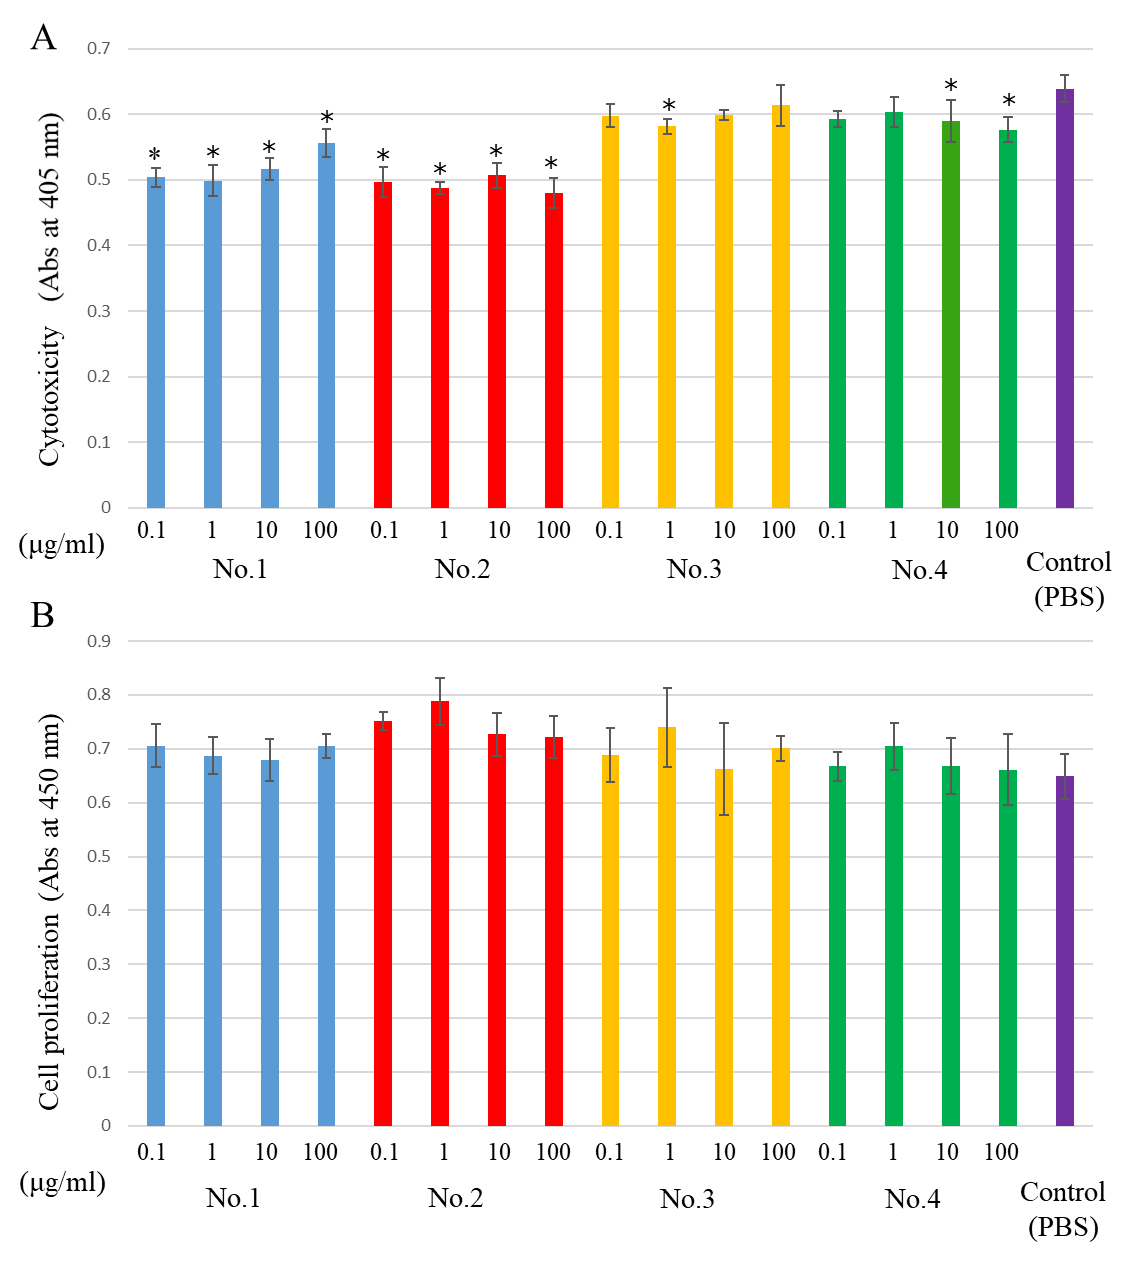


**Appendix Figure 1.** Effects of Protein S100 family-derived final candidate peptides on dental pulp cells in terms of cytotoxicity (LDH assay; panel A) and proliferation (WST-1 assay; panel B). Peptide Nos. 1 to 4 were added to 10% FBS-containing α-MEM at concentrations of 0.1, 1, 10, and 100 μg/mL with 5,000 hDPSCs/well; the cells were cultured for two days at 37°C with 5% CO2. Culture supernatants were collected and subjected to lactate dehydrogenase (LDH) assays using the LDH Cytotoxicity Detection Kit (Takara Bio, Shiga, Japan). WST-1 assays were performed using the Premix WST-1 Cell Proliferation Assay System (Takara Bio) after the cells had been cultured with the indicated peptide for one day. The number of specimens of each condition was 6. (**A**) All test samples demonstrated significantly lower or equal cytotoxicity, compared to the control (“*” indicates significantly different from the control, one-way ANOVA followed by Tukey test, p<0.05) (**B**) There were no significant differences in cell proliferation among the test samples or between any test samples and the control (Kruskal–Wallis test, p>0.05).

**Appendix Figure 2**


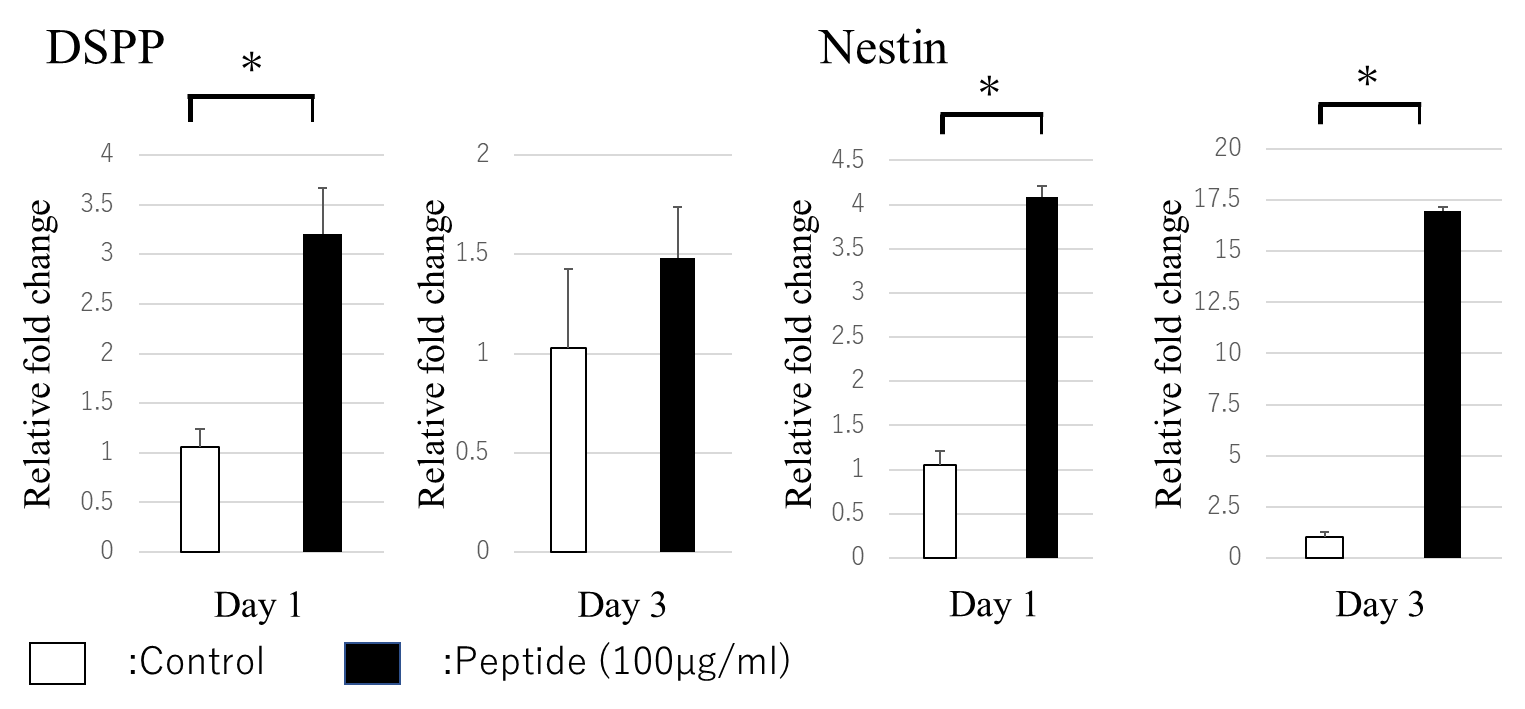


**Appendix Figure 2.** Results of real-time quantitative transcription polymerase chain reaction (RT-qPCR) to assess the gene expression of hDPSCs under peptide stimulation. hDPSCs were seeded (15×106 cells/well) with the addition of peptide No. 1 (100 µg/ml) or not, and incubated under a 5% CO2 atmosphere at 37°C for 1 or 3 days in the growth medium. Phosphate buffered saline was used as a control. After the incubation, total RNA was isolated using an RNeasy Mini Kit (Qiagen) and reverse-transcribed into cDNA with a High Capacity cDNA Reverse Transcription Kit (Thermo Fisher Scientific). RT-qPCR was carried out in triplicate with a Thunderbird® SYBR® qPCR Mix Kit (Toyobo) and 7500 Fast Real-Time PCR system (Thermo Fisher Scientific). The primer sequences for *DSPP*, *Nestin*, and *GAPDH* are listed in Appendix Table 4. All procedures were performed according to the manufacturer’s instructions. The ΔΔCt method was used to quantify changes in the relative expression, where all data were normalized to GAPDH. Both *DSPP* and *Nestin* were significantly upregulated on day 1, while only *Nestin* was upregulated on day 3 compared with the control (“*” indicates significantly different from the control, Student’s *t*-test).

**Appendix Table 4.** Primer sequences for real-time quantitative transcription polymerase chain reaction


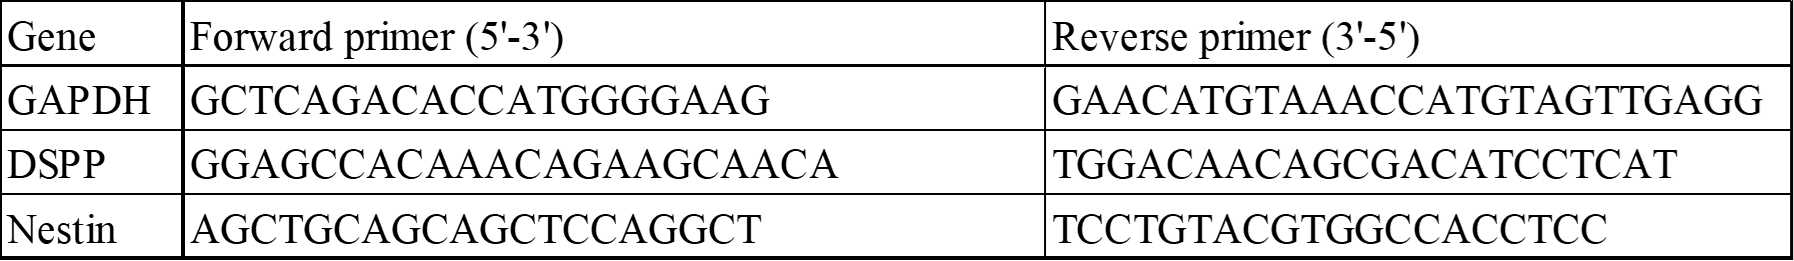

Supplement: Supplementary file 1 [file 38308167]
